# Supplementary material for: Hnf1b haploinsufficiency differentially affects developmental target genes in a new renal cysts and diabetes mouse model
Source: PubMed Central journal article supplement (PMC8126479; doi:10.1242/dmm.047498), 2021-05-04
Supplement: dmm-14-047498-s1.pdf [file dmm-14-047498-s1.pdf]

**Figure S1: Structure and generation of the *Hnf1b* intron-2 spliced mutant mice.**

**A:** Genomic organization of the *Hnf1b* locus, illustrating the 9 coding exons and main functional domains (N-terminal Dimerization, POU-specific (POU<sub>S</sub>) and POU-homeodomain (POU<sub>H</sub>) and C-terminal transactivation domain). Also indicated are the mutation G to T introduced at the intron-2 splice donor site; the Nuclear Localization Signal (NLS) and the location of the alternative exon of 78 base pairs (bp) present in the *Hnf1b* isoform A (variant A) or without (variant B). **B:** Characterization of abnormal spliced *Hnf1b* transcripts generated by the *HNF1b*<sup>Sp2/+</sup> mutant allele. Representative semiquantitative RT-PCR from P1- kidney RNA of *WT* (lanes a, b) and *HNF1b*<sup>Sp2/+</sup> (lanes c, d), using primers located in exon 1 and exon 3 (Material and Methods). Amplifications were performed for different cycles ranging 27 to 36 for *Hnf1b* (lanes a, c and lanes b, d correspond respectively to 30 and 33 cycles) and for *Gapdh*, used to normalize for RNA amount for 24 to 30 cycles, (e, f, show 28 cycles). The structure of spliced products is depicted on the right panel. Sequence of PCR products indicated that *WT* express *Hnf1b* variants A and B, while *Hnf1b*<sup>Sp2/+</sup> mice express four additional abnormal spliced transcripts corresponding to variants A and B lacking either exon 2 or the last 32bp of exon2 because production of the cryptic splicing site within exon 2 (ss). Quantification of transcript levels normalized by *Gapdh*, in P1 *HNF1b*<sup>Sp2/+</sup> relative to *WT*, were for the normal transcripts *Hnf1b* (variant A+B) 67% and for the spliced isoforms (A Δexon2 + B Δexon2) 15% and for A+B Δ32pb 14%. The cDNA sequence of spliced isoforms and the encoded truncated proteins from the mutated *Hnf1b* allele are shown in Material and Methods **C:** Cryptic splice site (SS) within exon-2 of mouse *Hnf1b* and human *HNF1B* gene and the 5'splice consensus sequence. Italics show part of the sequence of exon2 spliced out. **D** Semiquantitative RT-PCR from the indicated embryo stages and adult kidney RNA of *WT* and *HNF1b*<sup>Sp2/+</sup> show that heterozygous mutants exhibit a similar pattern of alternative spliced variants to those shown in Panel B at P1.

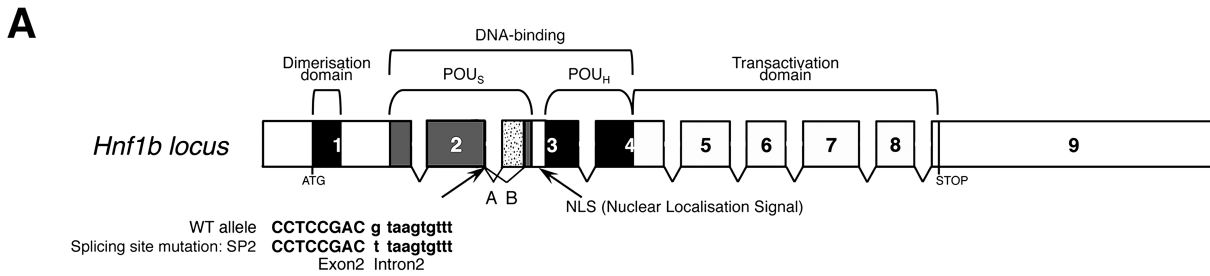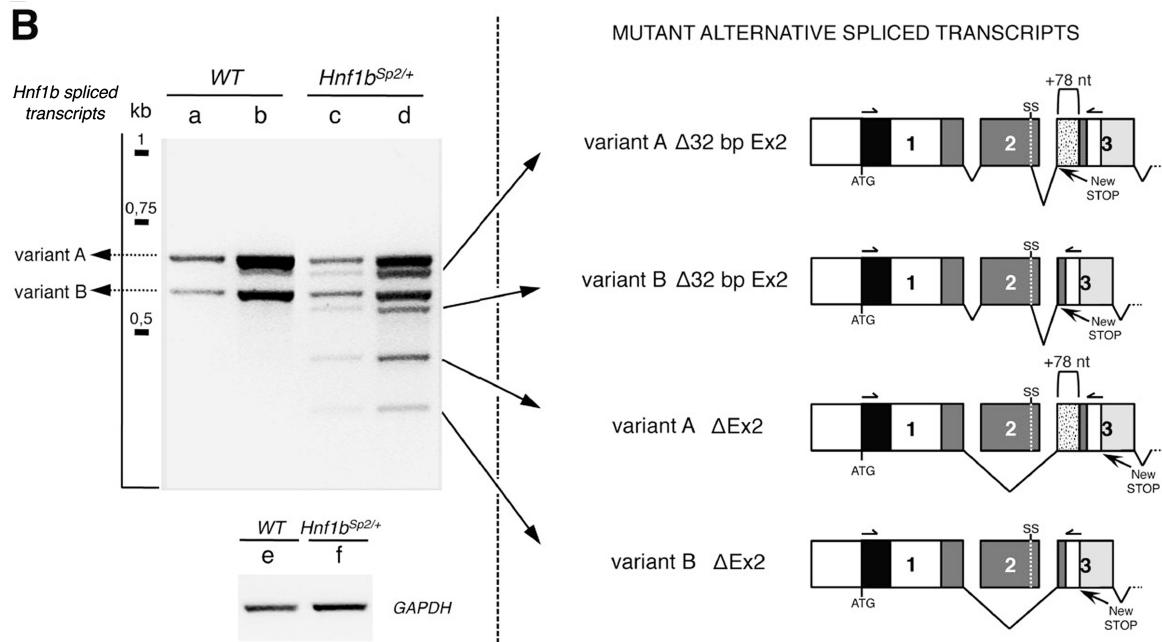

**C**

The Cryptic 5' donor splice site within *Hnf1b*-Exon 2 (SS)

Mouse *Hnf1b* exon2 GCTGCCCTGTACACTTG **GTACGTCAGAAAGCAACG**  
Human *HNF1B* exon2 GCCGCTCTGTACACCTG **GTACGTCAGAAAGCAACG**

CONSENSUS 5' splice site A/CAG **GTA/GAGT**

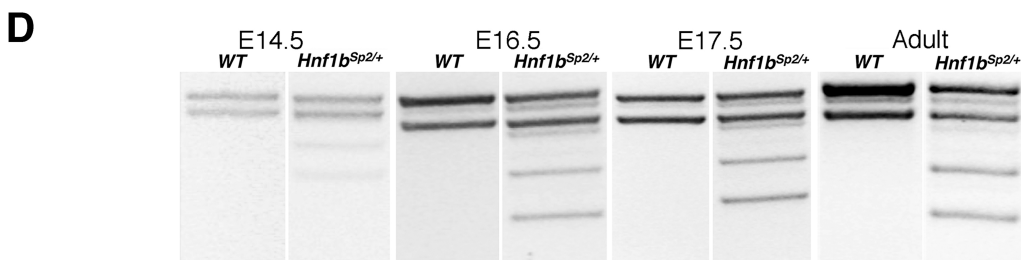

Figure S1

**Figure S2: Representative western blots of *WT* and *Hnf1b*<sup>Sp2/+</sup> kidney extracts at the indicated stages and adult mice.** Note that HNF1B isoforms A and B migrate very close and were quantified together.  $\alpha$ -tubulin was used to normalize for protein amount as described in Material and Methods. A-C, E: controls corresponding to extracts from transfected cells with expression vectors for HNF1B-variant A (557 amino acids) and for truncated spliced mutant isoforms A  $\Delta$ exon2 (169 amino acids), B  $\Delta$ exon2 isoform (143 amino acids) or A/B  $\Delta$ 32pb (170 amino acids). C: extracts from transfected cells with HNF1B-A, the isoforms A/B $\Delta$ 32pb, A $\Delta$ exon2 or B $\Delta$ exon2 as controls and the indicated increased amounts of E17.5 whole kidney extract from *Hnf1b*<sup>Sp2/+</sup> showing the absence of truncated isoforms. D shows extracts PO and P1 extracts from respectively the same litters. Dotted vertical line in Panel D (P1), denote that a lane was cut out because of a bubble during transfer, making no possible quantification analysis; otherwise P1 samples were all from the same gel.

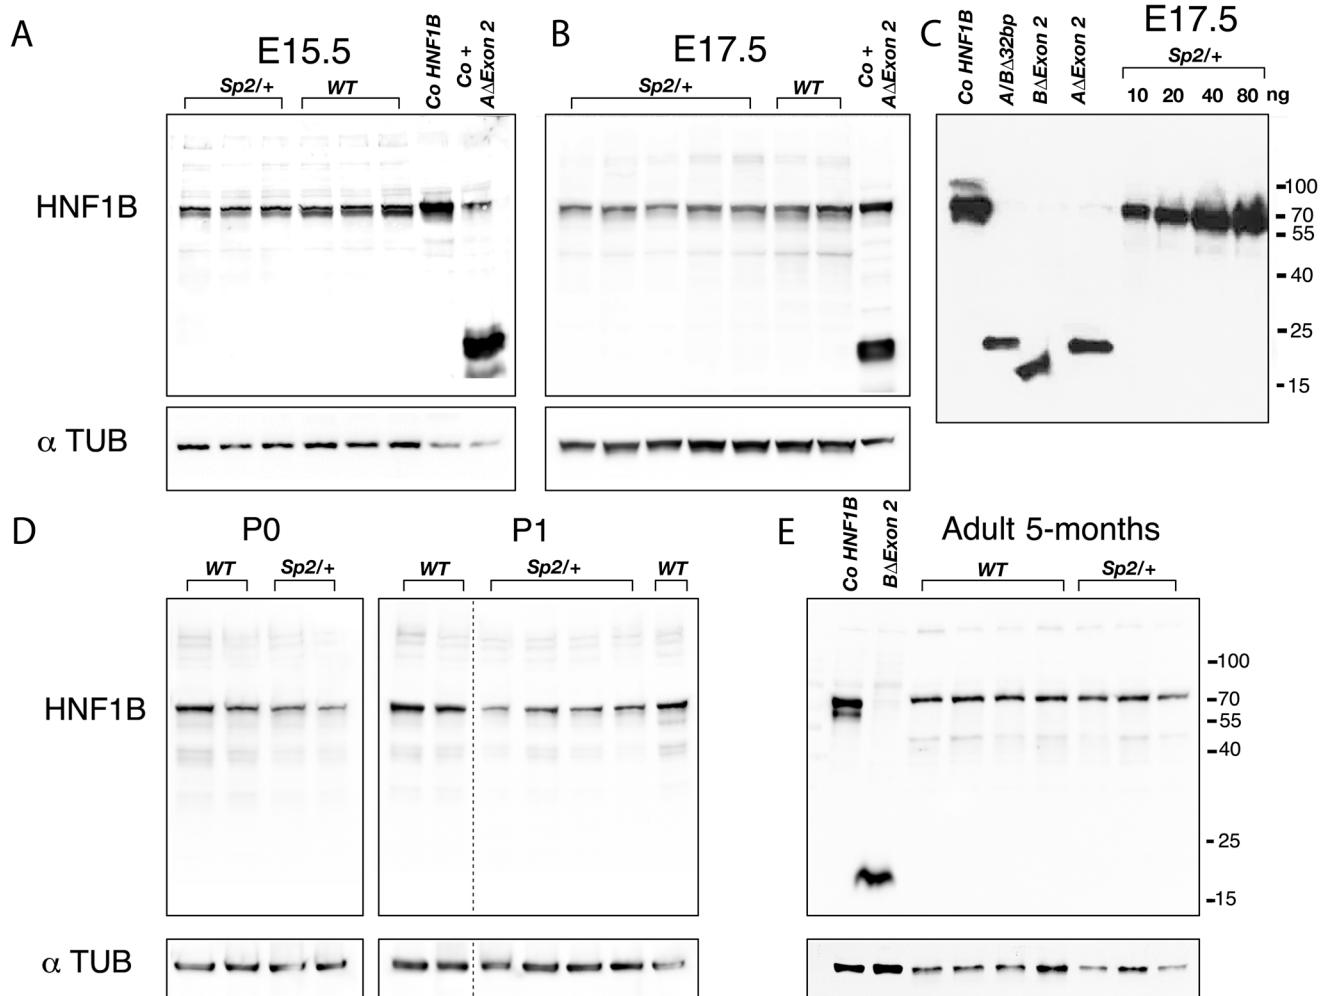

Figure S2

**Figure S3: *Hnf1b*<sup>Sp2/+</sup> E14.5 embryo kidneys show normal histology, branching morphogenesis and nascent nephron structures**

**A) Hematoxylin and Eosin (H&E) stained sections:** Upper panel, F1 background (mixed C57BL/6Nx129/sv background), middle panel C57BL/6N and Lower panel 129/sv inbred backgrounds, showing in each case one E14.5 WT kidney and the two *Hnf1b*<sup>Sp2/+</sup> kidneys of the same litter. Scale bar: 200µm.

**B) Immunostainings of Calbindin and PAX-2 show normal expression pattern in E14.5 *Hnf1b*<sup>Sp2/+</sup> kidneys.** Calbindin-D-28K expressed in the emerging ureteric bud branches, highlights branching morphogenesis, while PAX-2 denotes induced metanephric mesenchyme, UB branches, nascent nephrons, renal vesicles (RV) and S-shaped bodies (SSB) (magnifications in insets)

**C) HNF1B and WT1 immunostaining analysis on E14.5 serial kidney sections show rare examples at this stage of expanded Bowman's capsule (g) and cystic tubules (cy) in *Hnf1b*<sup>Sp2/+</sup> (upper panels).** Pax2 immunostainings at different stages (E16.5, E18.5) show similar pattern in WT and *Hnf1b*<sup>Sp2/+</sup> (middle panels), indicating that the expression of Pax2 in *Hnf1b*<sup>Sp2/+</sup> is not affected throughout development. Note, however at E17.5 the presence of glomerular cysts and medullar tubular dilatations, likely Loop of Henle, which are not stained by Pax2. **Lower panel illustrate a rather similar expression profile of HNF1A in PTs of E17.5 WT and *Hnf1b*<sup>Sp2/+</sup>,** in contrast to the observed decreased expression of HNF1A at earlier stages (see Figure 3).

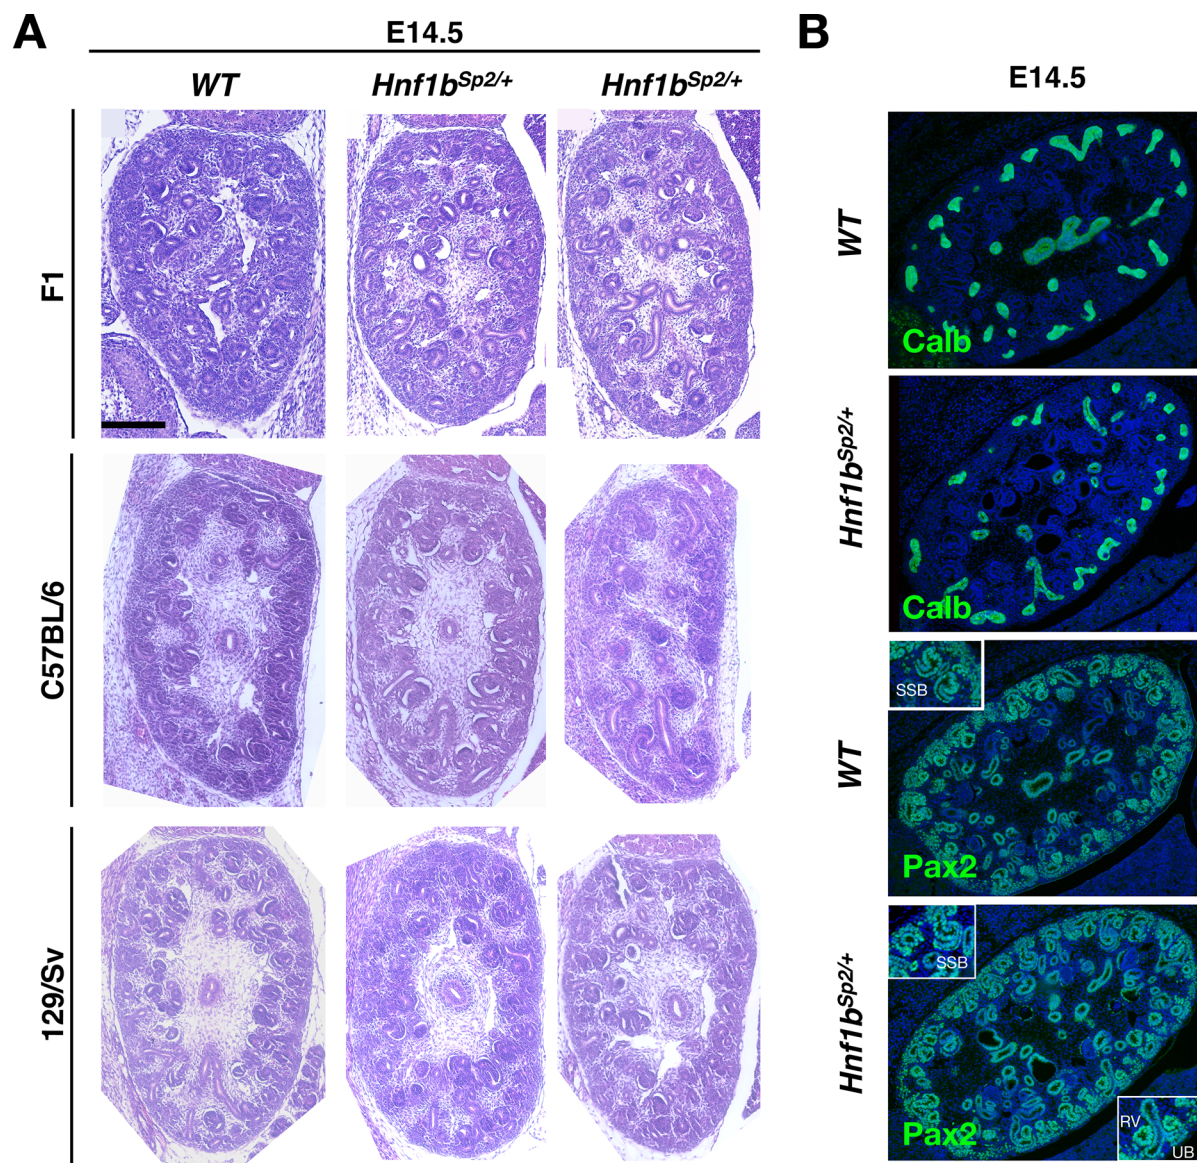

Figure S3

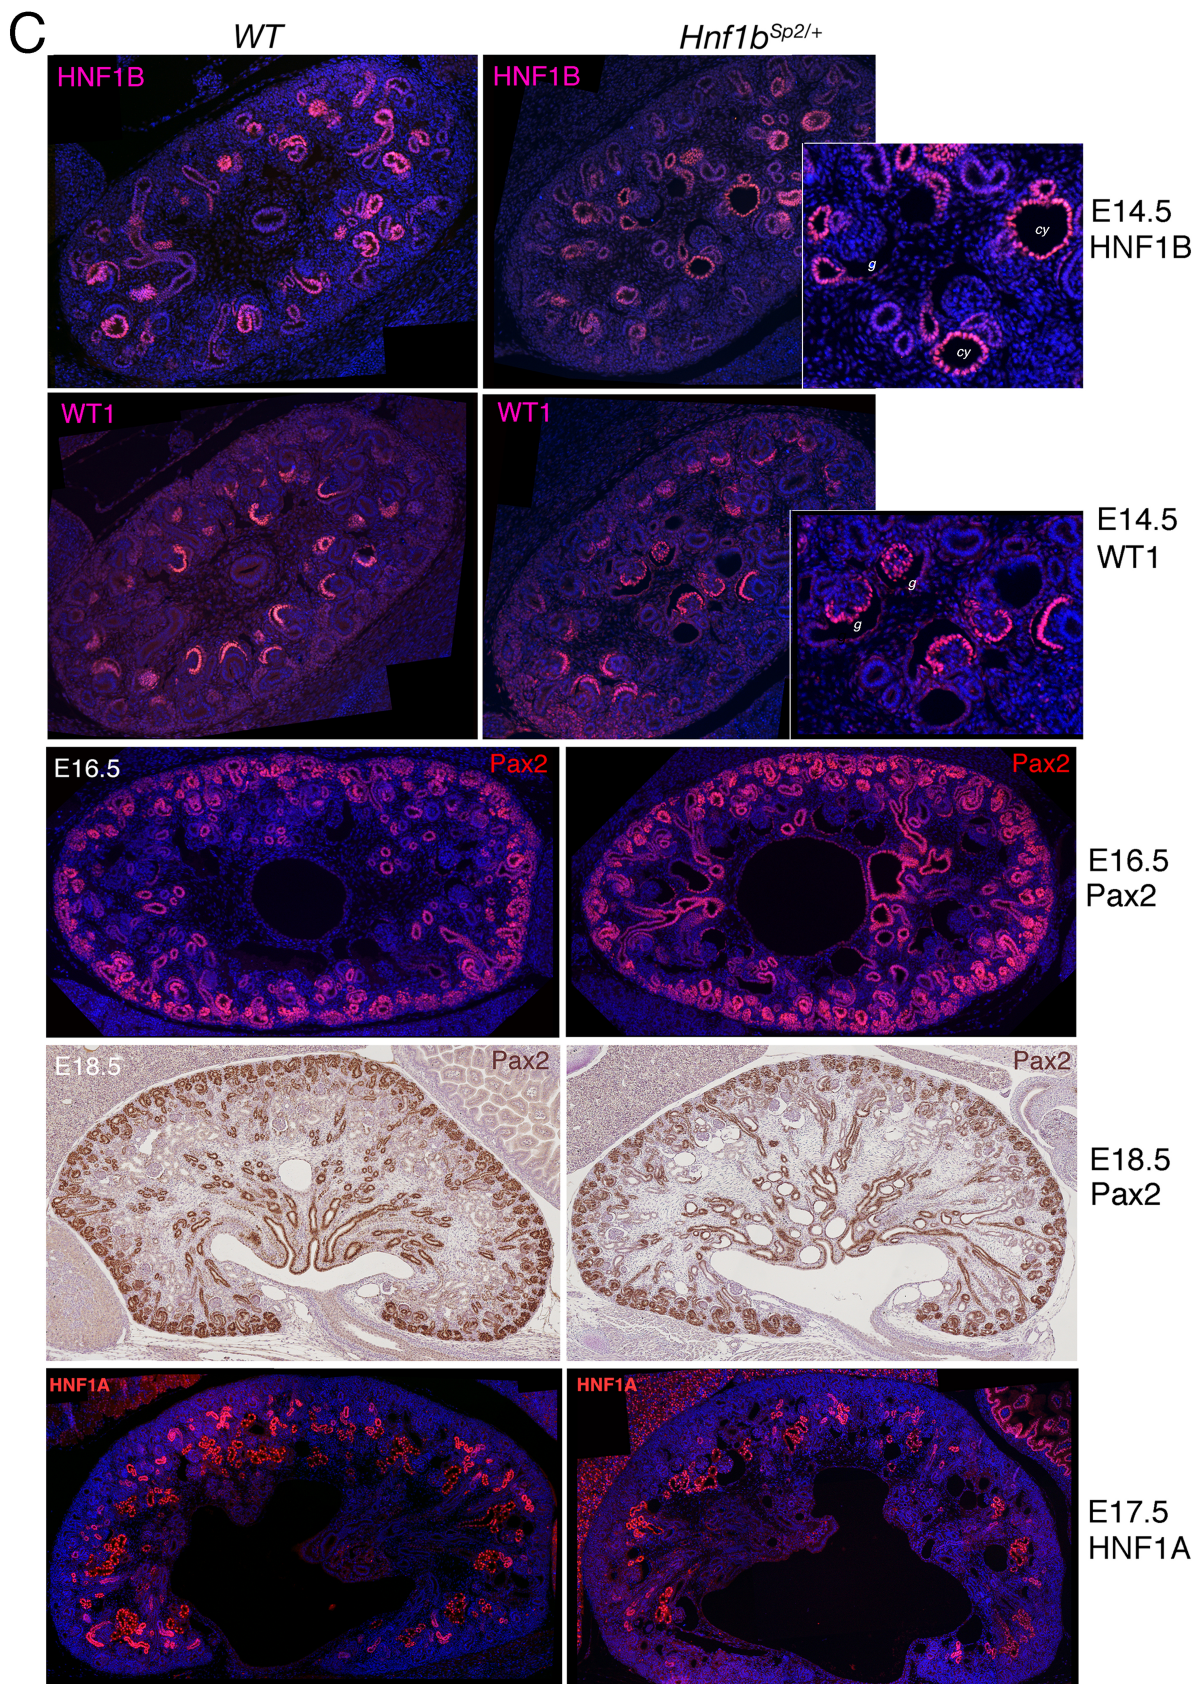

Figure S3C

**Figure S4: Representative Hematoxylin and Eosin (H&E) stained sections of P0 kidneys in the 129/sv and C57BL/6N background exhibiting increasing severity in the renal phenotype. Note frequent pelvic dilatations and /or hydronephrosis in the C57BL/6N background. The last two C57BL/6N kidney sections correspond to the same *Hnf1b*<sup>sp2/+</sup> embryo indicating bilateral severely affected kidneys (duplication, hydronephrosis) that would likely be incompatible with life.**

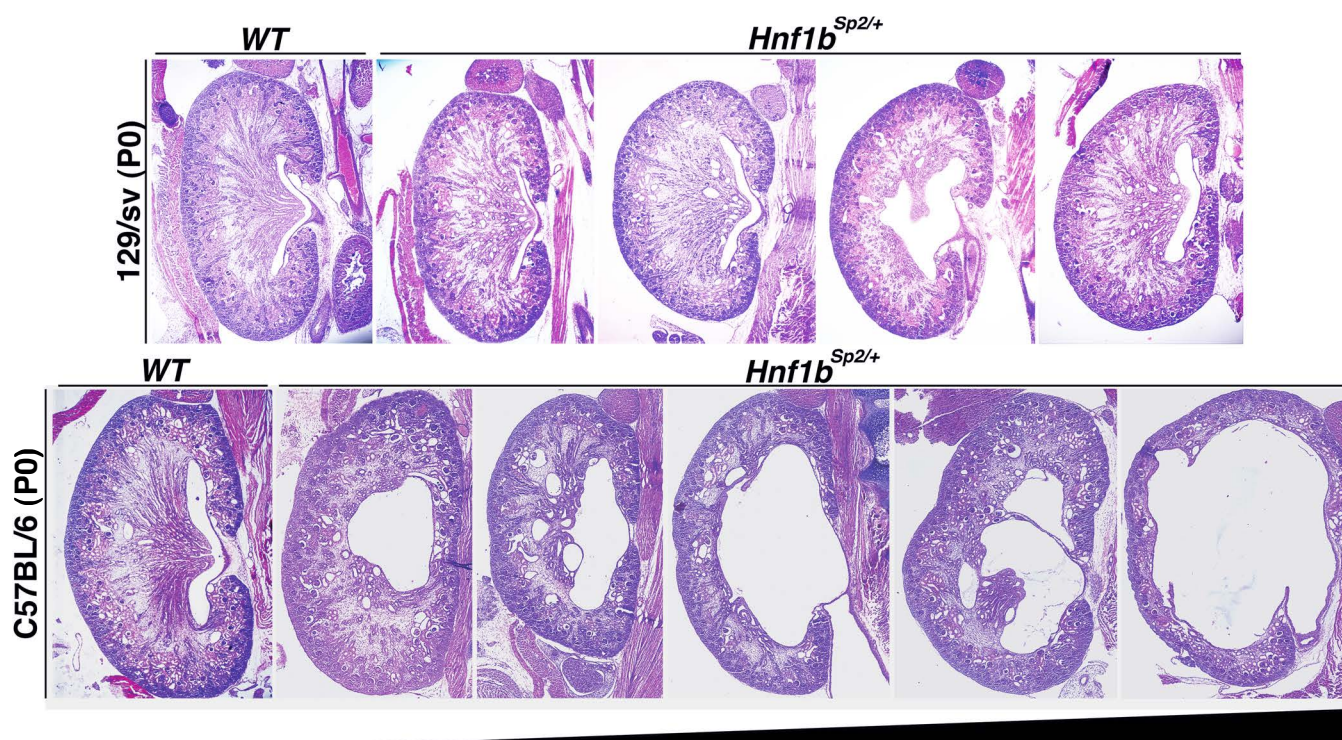

**Figure S4**



**Figure S5: Immunohistochemical analysis of E17.5 and P0 kidney sections show defective proximal tubules cluster size and DBA collecting duct expression.**

HNF4A and LTA staining show decreased and unequal clusters of PTs in *Hnf1b*<sup>Sp2/+</sup> kidneys at E17.5 (A', B') and P0 (F', G'). NKCC2 a marker of the thick ascending Loop of Henle, stains predominantly medullar–cortical cystic structures (C'; H'), AQP2 and CK collecting duct markers express similar to *WT* (D, D'; I, I'; E, E'), while DBA is absent in *Hnf1b*<sup>Sp2/+</sup> collecting ducts P0 (J'). Sections were co-stained with DAPI. Scale bar: 200µm

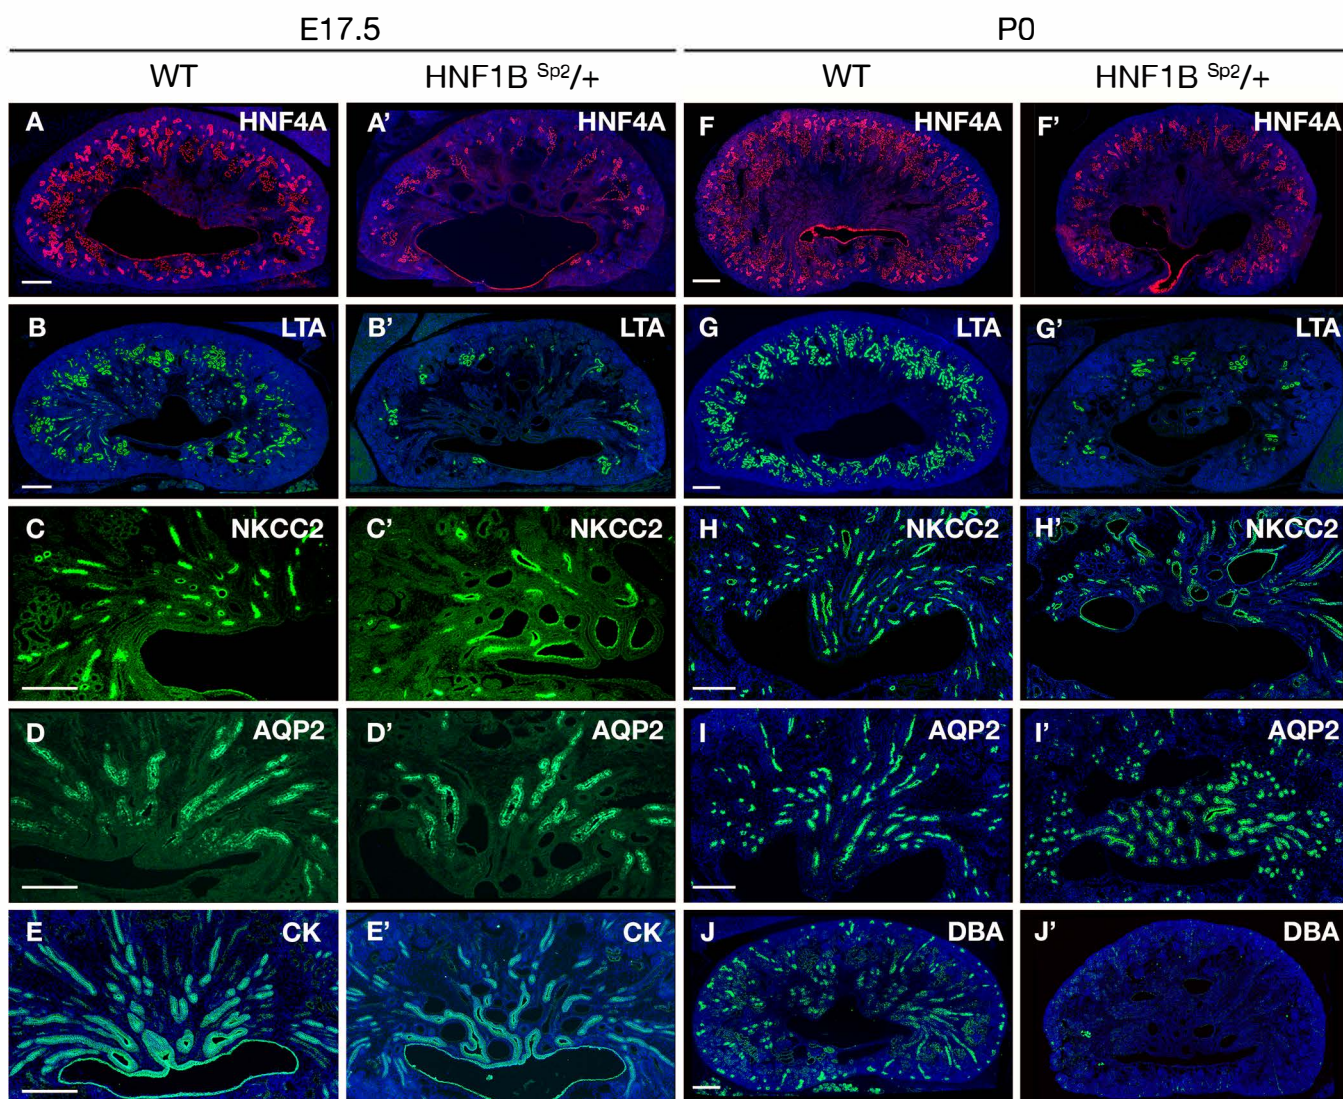

**Figure S5**

**Figure S6: Increased proliferation in *Hnf1b*<sup>Sp2/+</sup> renal tubules**

**A)** Representative images of phosphohistone H3 (H3P) and Pax2 co-stained E14.5 show similar numbers of H3P+ cells in epithelial tubular structures as compared with **WT as indicated the quantification shown on the right panel** (*Hnf1b*<sup>Sp2/+</sup> n=3; WT n=3). **B)** Representative images of phosphohistone H3 (H3P) and HNF4A co-staining of E15.5 embryos show that dilated PTs exhibit an increased numbers of H3P+ cells per structure as compared with *WT*. **C)** Quantification of pH3-positive cells in PAX2 and H3P co-stained renal tubules of E16.5 *Hnf1b*<sup>Sp2/+</sup> embryos (n=8 sections; 3 embryos), indicates an increase of proliferating cells relative to *WT* (n=9 sections; 2 embryos). A higher and significant increase was also observed when compared proliferating cells of *Hnf1b*<sup>Sp2/+</sup> dilated/cystic tubules versus non-dilated tubules. Note also a significant reduction in the number of renal tubules of *Hnf1b*<sup>Sp2/+</sup> relative to *WT*, while not significant (NS) changes in the number of nascent nephrons and glomeruli are observed. Unpaired *t*-test. p <0.01 (\*\*) and p<0,0001 (\*\*\*) are indicated

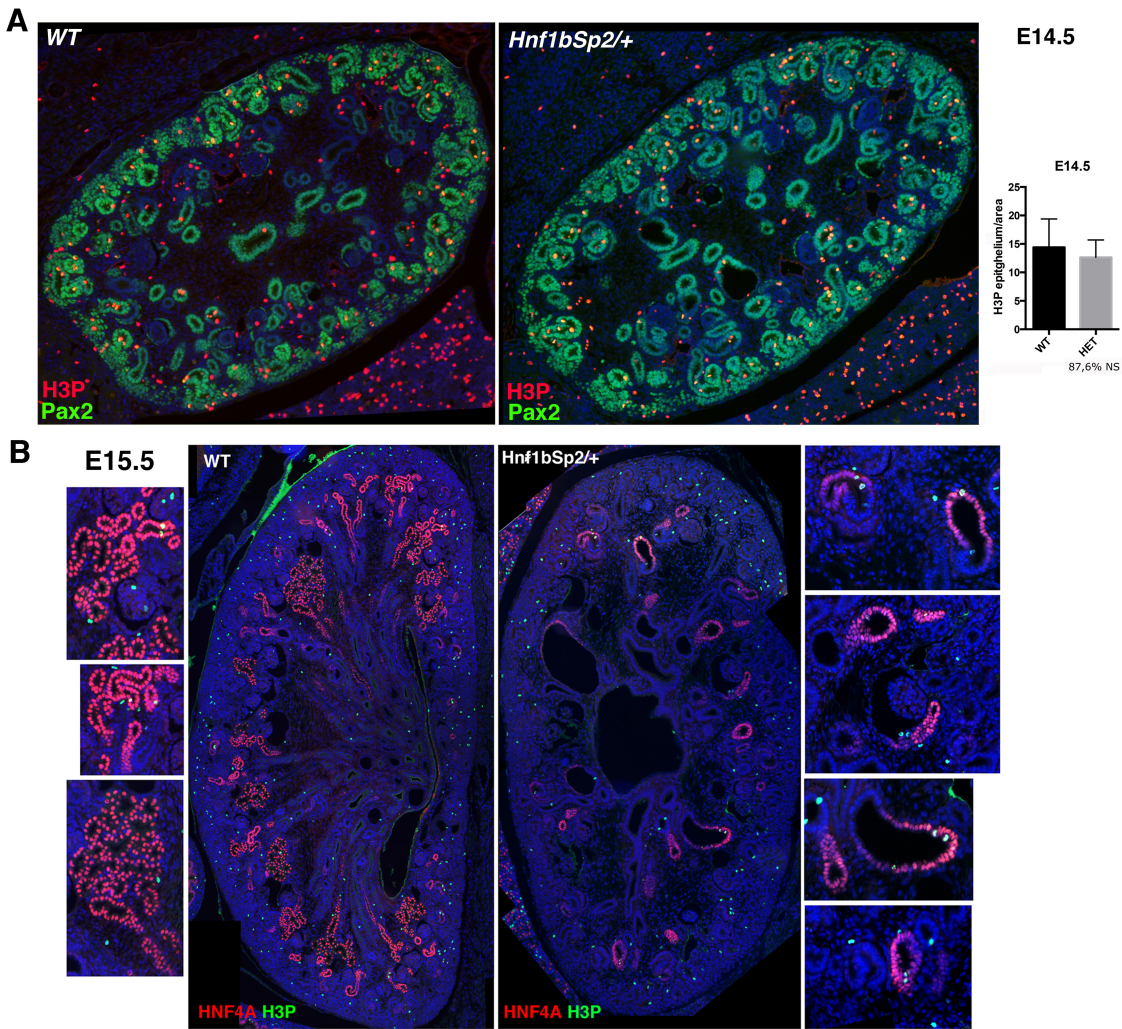

Fig.S6 A,B

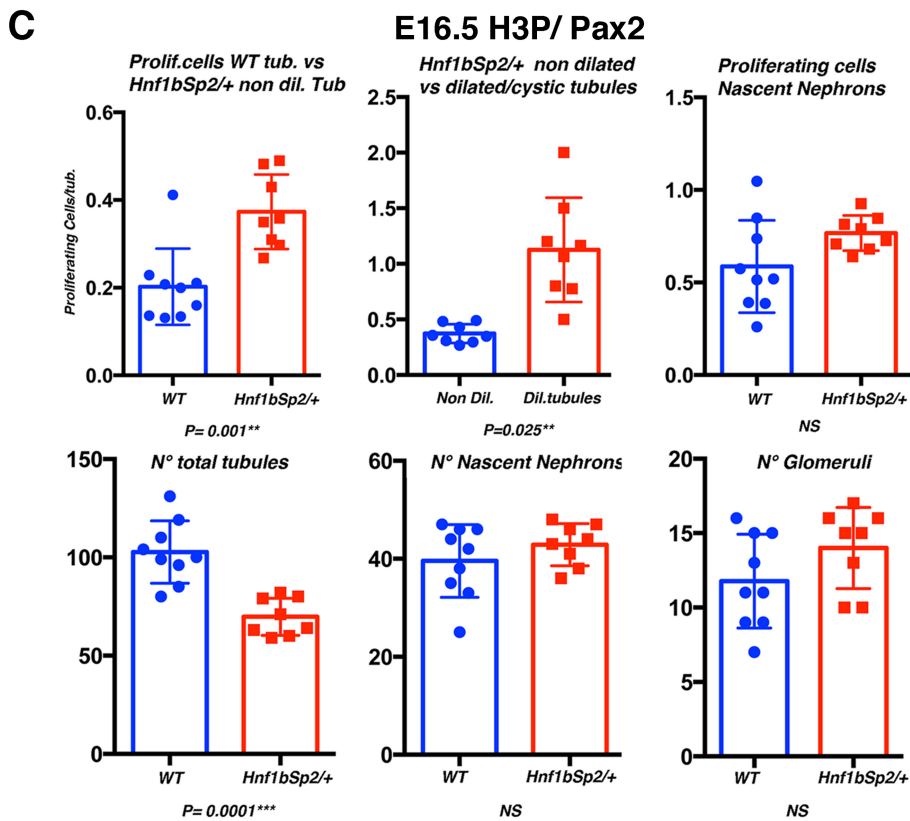

Figure S6C

**Figure S7: HIS of early proximal tubule anchor genes *Fbp* and *Spp2*. mRNA levels of previously established *Hnf1b* target genes in *WT* and *Hnf1b*<sup>Sp2/+</sup> at different embryonic stages and at P0.**

**A:** In situ hybridization at E17.5 and P0 of *WT* and *Hnf1b*<sup>Sp2/+</sup> kidneys show a strong decrease of *Fbp* at both stages and a more modest decrease of *Spp2*. **B:** mRNA levels of the indicated genes at E14.5, E15.5, E17.5 and P0 stages were determined by qRT-PCR and normalized by *cyclophilin-A* expression. Number of *WT* and *Hnf1b*<sup>Sp2/+</sup> samples used are indicated, n being a pool of the 2 kidneys of each embryo. Values are represented as percentage of *WT* controls. Note the modest and non-significant downregulation of several target genes. Unpaired *t*-test. Significant differences between *WT* and *Hnf1b*<sup>Sp2/+</sup> ( $p < 0.05$  (\*)) and  $p < 0.01$  (\*\*)) are indicated. Error bars represent standard error of the mean (SEM).

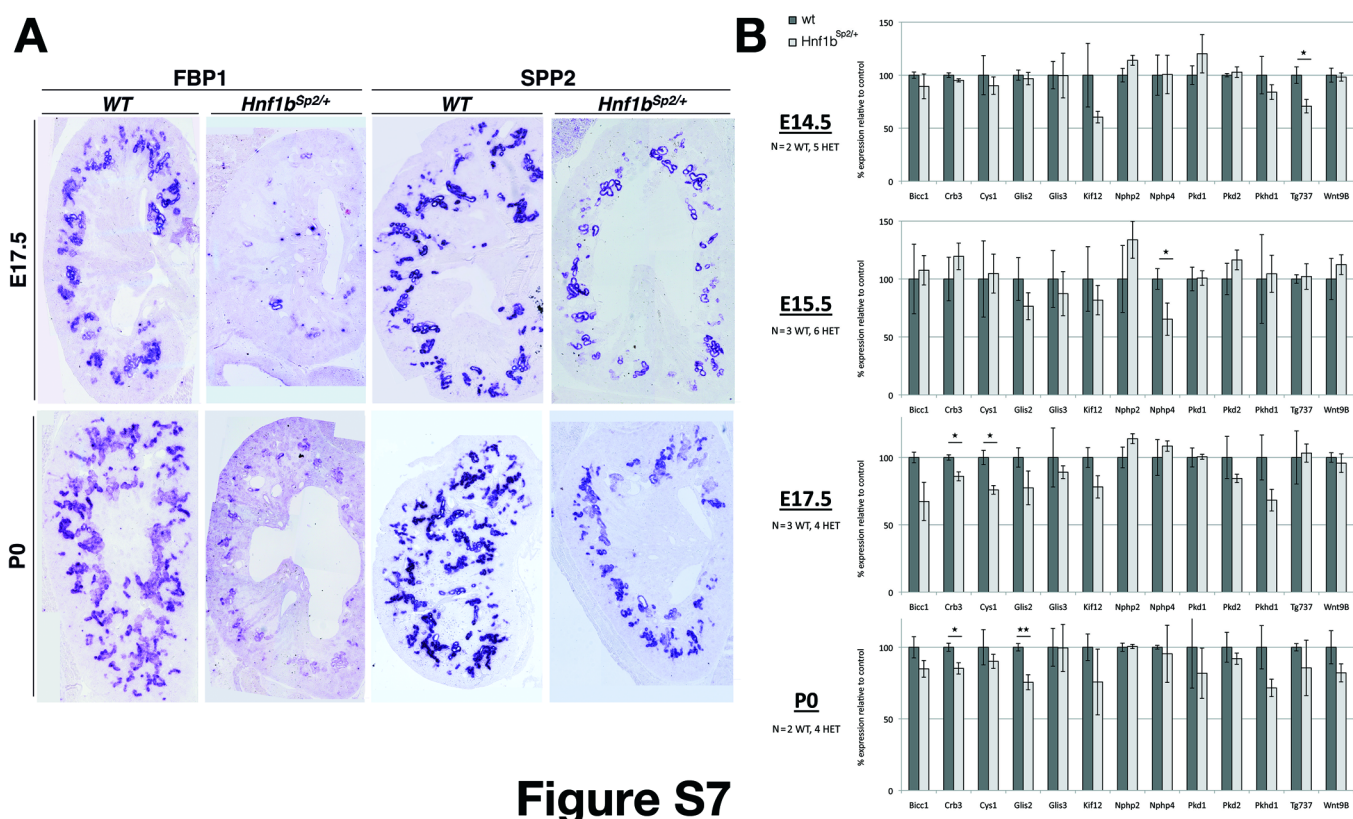

**Figure S8: Comparison of different PT markers and previously identified *Hnf1b* target genes in E16.5 *Hnf1b*<sup>sp2/+</sup> versus *Hnf1a* null kidneys.** Note that the PT markers HNF4A, CUBILIN, MEGALIN and LTA are not downregulated in *Hnf1a*<sup>-/-</sup> embryos (right panel), while are strongly downregulated in *Hnf1b*<sup>sp2/+</sup> embryos (middle panel) relative to *WT* (left panel) showing that during development the expression of PT genes does not depend on *Hnf1a*.

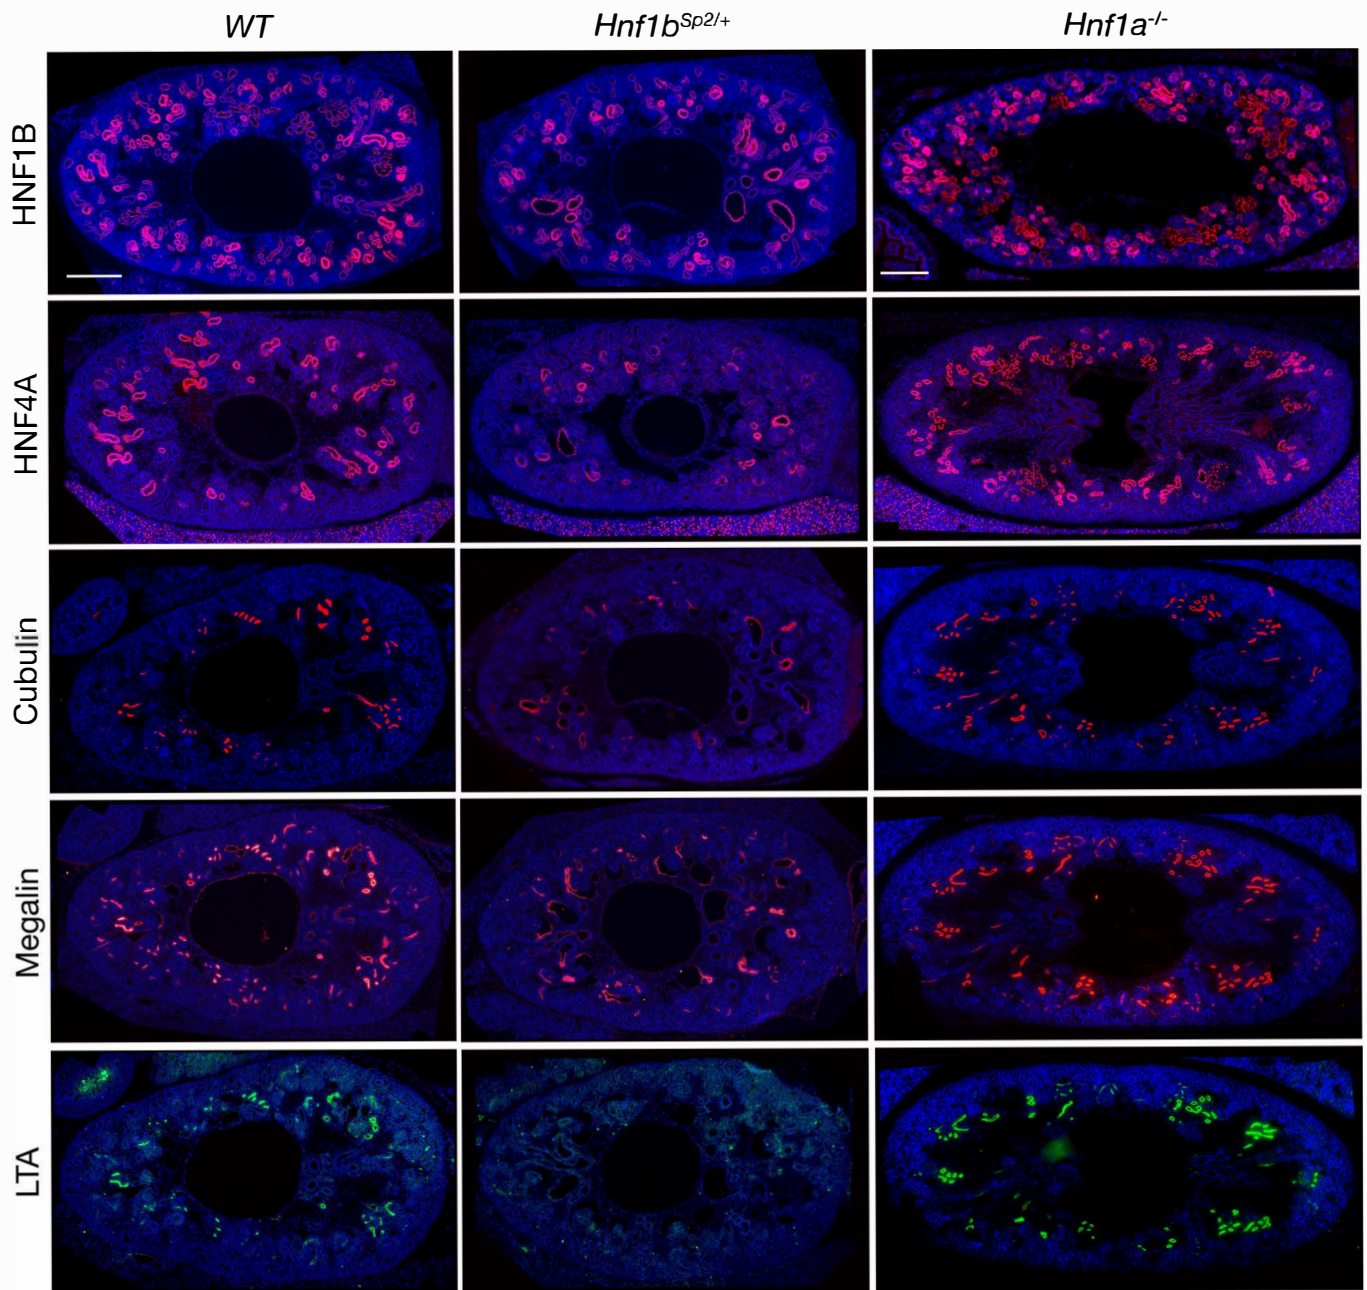

Figure S8

**Figure S9: Representative histological sections of adult kidneys from *Hnf1<sup>Sp2/+</sup>* males and females illustrate disease variation.** H&E stained sections of male kidneys of *WT* 12 months (A) and *Hnf1b<sup>Sp2/+</sup>* (B- F) showing kidney sections of 2month (B), 11 month- (C) 5 month- (D), 17 month- (E), 12 month-old (F). H&E stained sections (G, J, K, L) and trichrome Masson (H, I) stained sections of female kidneys. G: *WT*; H to L of *Hnf1b<sup>Sp2/+</sup>* of 2-months (H), 12 months (I), 17 months (J), 15 months (K, L). Note clusters of glomerular cysts (magnifications shown in B', E', F', I', I''), microcysts (B, H, I), cell-debris within glomerular cysts (black arrow-heads and surrounding hemorrhagic regions (red arrow-heads), and severe hydronephrosis in both old males (E) and females (L) and rare cases of a severe dysplastic kidney (F). Note no evidence of fibrosis in trichrome Masson stained sections (H, I).



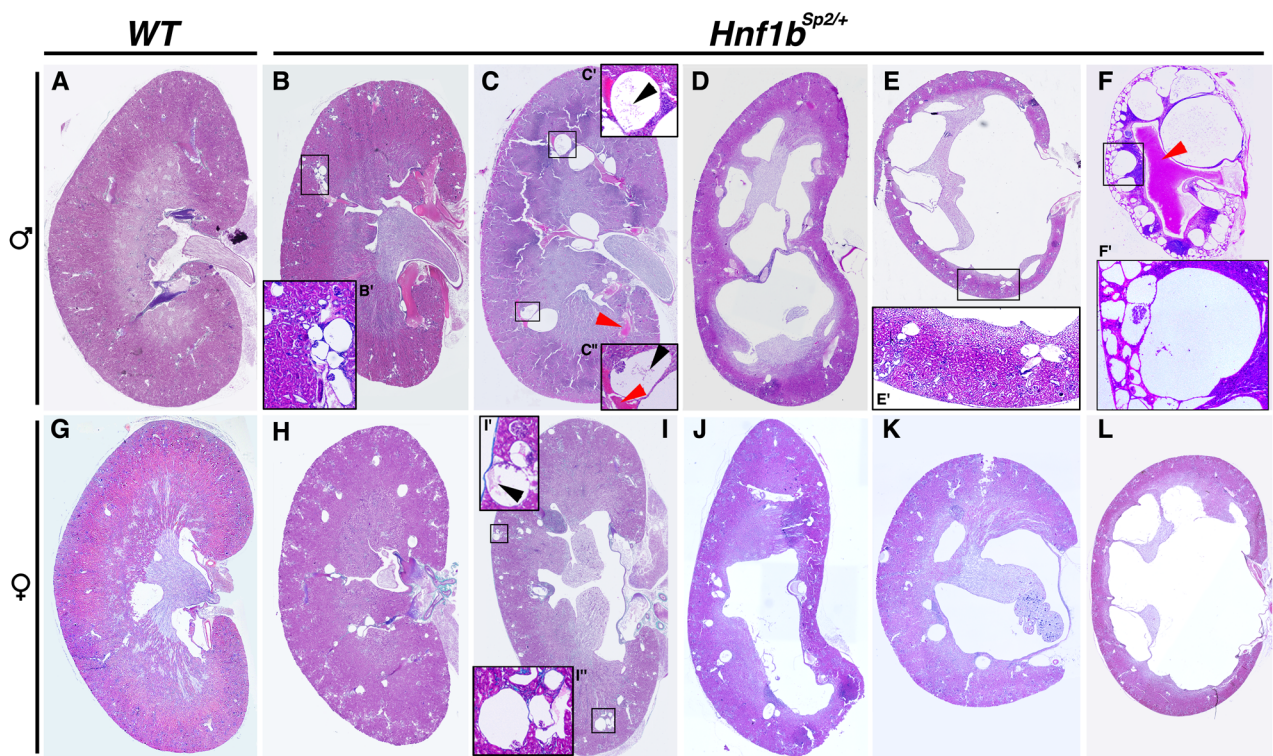

**Figure S9**

**Figure S10: Representative histological sections of the Left and Right kidneys of *Hnf1b*<sup>Sp2/+</sup> adult males and females, illustrating the variable severity. Body weight curves and kidney weight/body weight ratios.** H&E stained sections of the Left and Right kidneys of males (left panel) and females (right panel). **Male Age:** A, A': 17-months; B, B': 13-months; C, C': 10-months; D, D': 16-months; E, E': 9-months; F, F': 17-months; G, G': 17-months; H, H': 12 months. **Female Age:** A, A': 2 months; B, B': 13-months; C, C': 17-months. Unilateral hydronephrosis and pelvic dilatations in 6 to 17 months-old *Hnf1b*<sup>Sp2/+</sup> mice were observed in respectively 41% and 14 % of *n*=43 males, and 33% and 27% of *n*=18 females. The right lower panel shows body weight curves of males (at the left) and females (at the right) at different ages. Note the tendency of 20% reduction in body weight of both *Hnf1b*<sup>Sp2/+</sup> males and females, although lower numbers of females were examined. Note also that one month-old heterozygous mutants exhibited lower kidney weight/body weight ratios than *WT* reflecting mild hypoplastic kidneys.

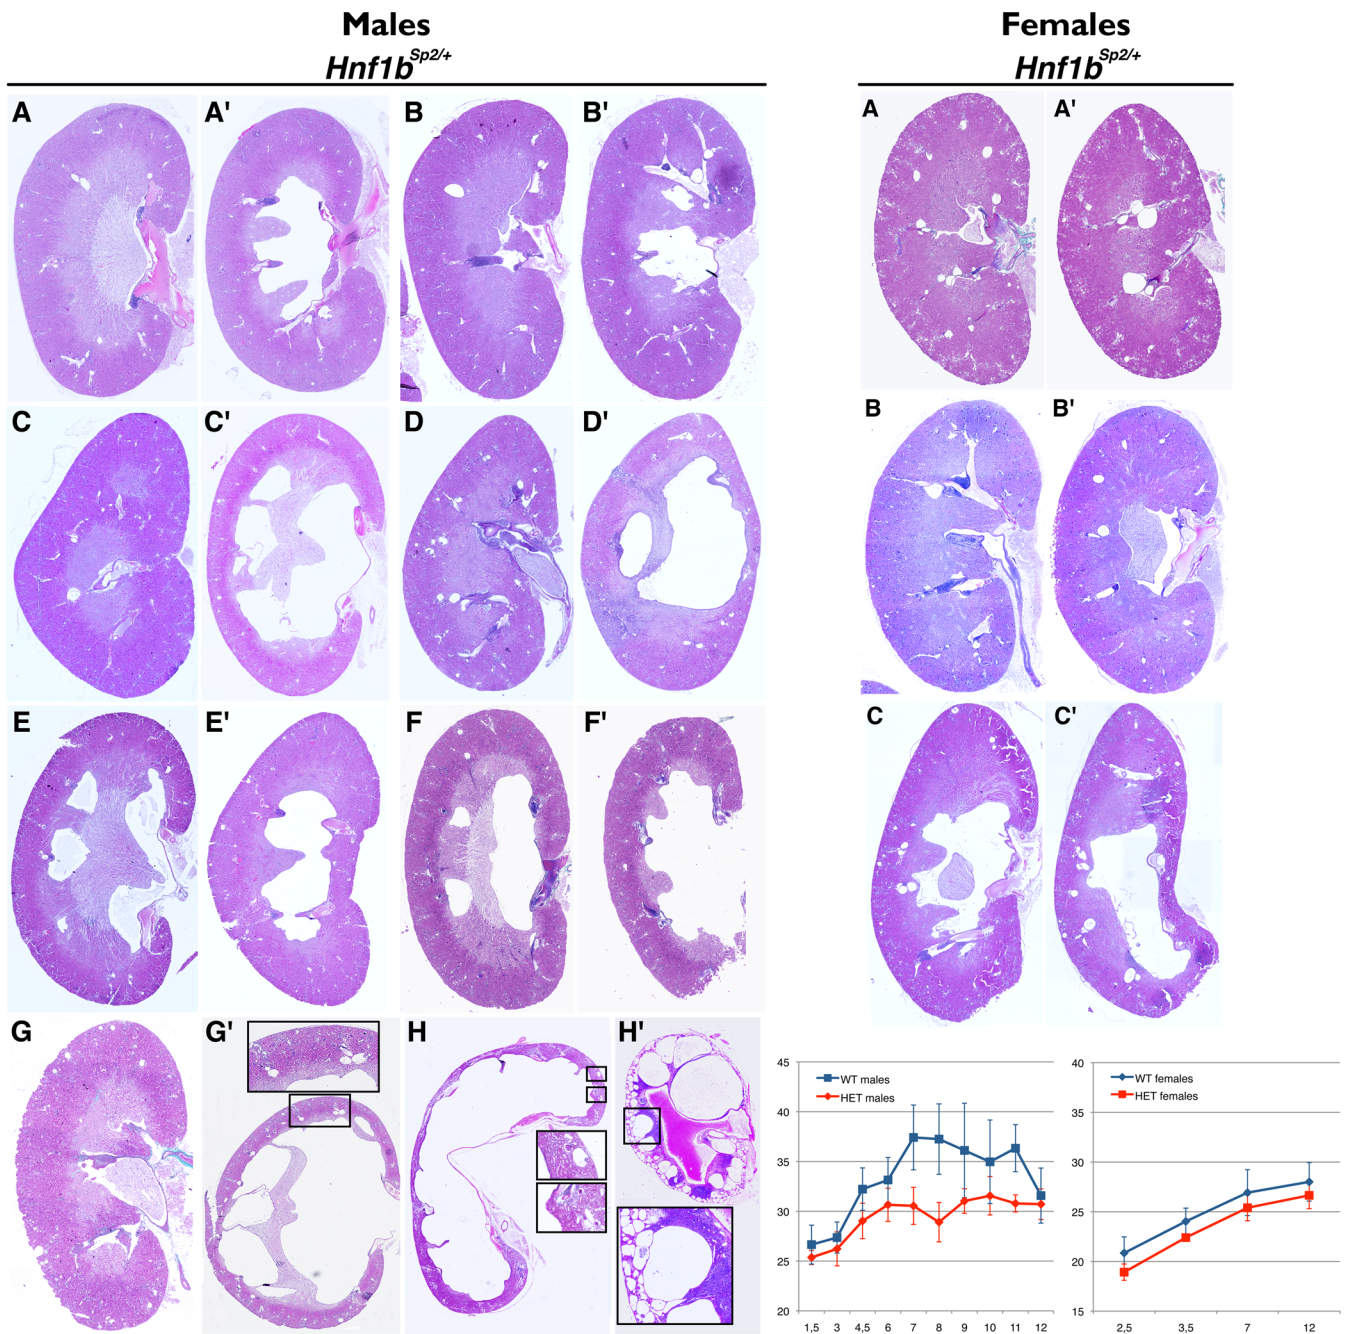

**Figure S10**

**Figure S11: WT1 staining of E15.5 *Hnf1b*<sup>Sp2/+</sup> kidneys**

E15.5 *Hnf1b*<sup>Sp2/+</sup> kidney section stained with WT1 showing a glomerular cyst with expanded Bowman's Capsula (BC) and glomerular tuft (gt) that have lost the expression of WT1. Note adjacent tubular cyst (cy) and normal WT1 expression of next podocyte layers, early nephron structures and condensed mesenchyme.

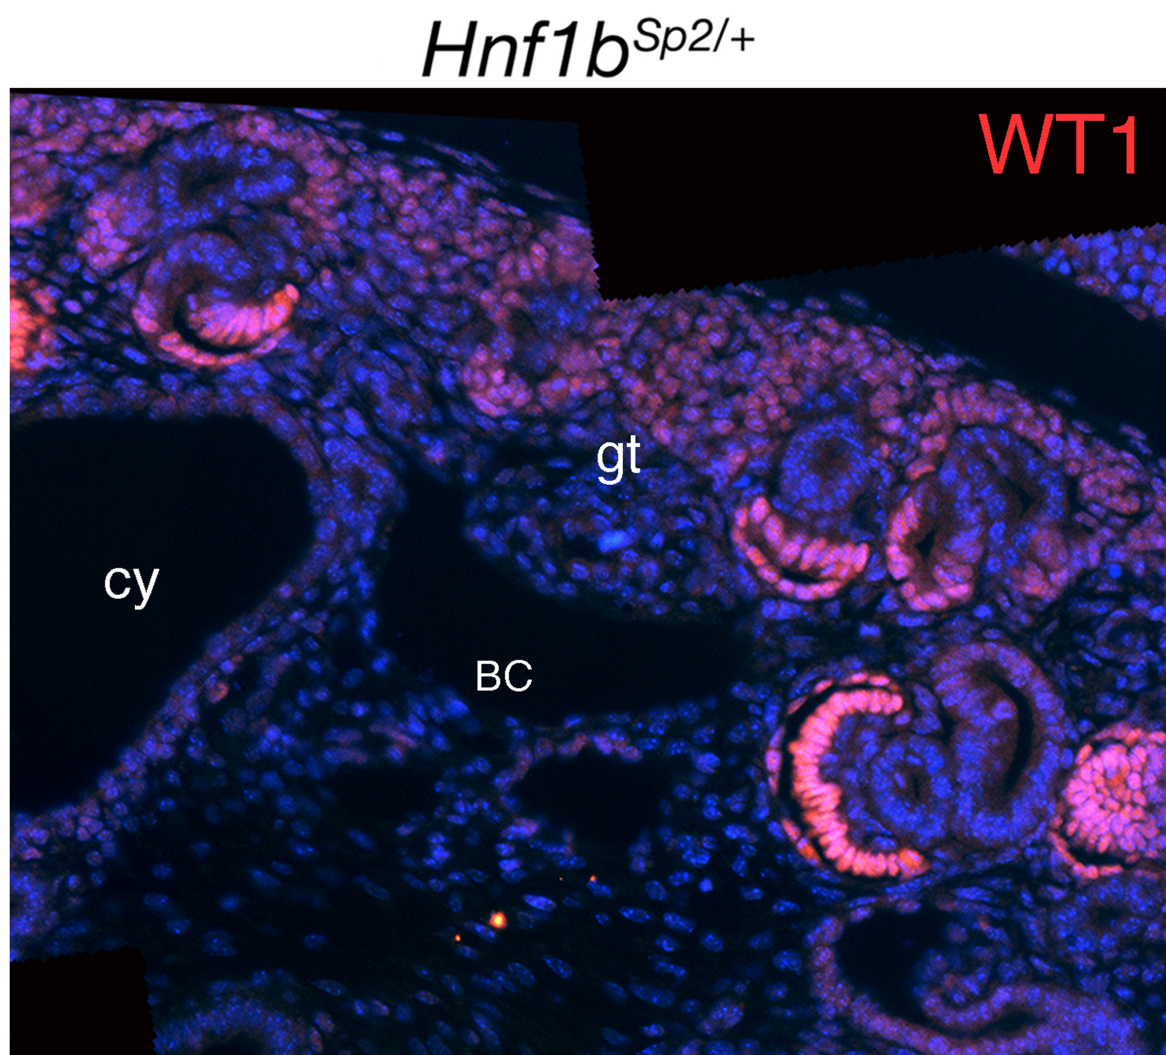

**Figure S11**

**Table S1: Percentages of renal phenotypes at E18.5 -P0 and Mendelian inheritance****S1A: Percentages of renal phenotypes of *Hnf1b*<sup>Sp2/+</sup> at E18.5-P0**

| <i>Hnf1b</i> <sup>Sp2/+</sup> Renal Phenotypes at E18.5-P0 | Fi | C57BL/6N | 129/sv |
|------------------------------------------------------------|----|----------|--------|
| N° kidney                                                  | 28 | 14       | 10     |
| Glomerular cysts (%)                                       | 82 | 83       | 70     |
| Tubular cysts (PT & LOH) %                                 | 68 | 83       | 80     |
| Pelvic Dilations (%)                                       | 3  | 41*      | 0      |
| Hydronephrosis (%)                                         |    | 33       | 0      |
| Duplicated kidney (%)                                      | 4  | 17       | 0      |
| Bilateral (%)                                              | 86 | 93       | 80     |
| <b>Severity</b>                                            |    |          |        |
| No phenotype (%)                                           | 14 | 0        | 20     |
| Weak (%)                                                   | 32 | 7        | 50     |
| Moderate to severe (%)                                     | 32 | 43       | 30     |
| Severe (%)                                                 | 22 | 50       | 0      |

Phenotypes were defined on the basis of histological analyses of whole kidneys and do not take in account RNA/immunohistochemistry data analyses. WT embryos do not exhibit renal phenotype, but moderate pelvic dilations were observed in 5% of C57BL/N6 WT mice (\*), suggesting that the *Hnf1b* splicing mutation exacerbates this phenotype. Note that in case of hydronephrosis, tubular dilations cannot be observed.

**Table S1B: Mendelian inheritance in the offspring of *Hnf1b*<sup>Sp2/+</sup> and WT intercrosses in different mouse backgrounds**

| Stage        | C57BL/6N                      |     |     |      | 129/Sv                        |     |     |      | F1                            |     |     |      |
|--------------|-------------------------------|-----|-----|------|-------------------------------|-----|-----|------|-------------------------------|-----|-----|------|
|              | <i>Hnf1b</i> <sup>Sp2/+</sup> | WT  | TOT | %HET | <i>Hnf1b</i> <sup>Sp2/+</sup> | WT  | TOT | %HET | <i>Hnf1b</i> <sup>Sp2/+</sup> | WT  | TOT | %HET |
| <b>E14.5</b> | 25                            | 32  | 57  | 43,8 |                               |     |     |      | 18                            | 11  | 29  | 62   |
| <b>E15.5</b> | 13                            | 15  | 28  | 46,4 | 9                             | 9   | 18  | 50   | 9                             | 10  | 19  | 47,3 |
| <b>E17.5</b> | 13                            | 12  | 25  | 52   | 9                             | 12  | 21  | 42,8 | 16                            | 19  | 35  | 45,7 |
| <b>P0</b>    | 10                            | 12  | 22  | 45,4 | 10                            | 8   | 18  | 55,5 | 20                            | 21  | 41  | 48,7 |
| <b>Adult</b> | (125*)<br>(118*)              | 223 | 348 | 35,9 | 241                           | 265 | 506 | 47,6 | 99                            | 133 | 232 | 42,6 |

Are indicated the number of embryos and/or animals of WT and heterozygous *Hnf1b*<sup>Sp2/+</sup> mutant obtained from *Hnf1b*<sup>Sp2/+</sup> males x WT females in the indicated genetic backgrounds, the total embryos or animals (TOT) and percentages of heterozygotes. Numbers with \* in C57BL/6N background mice indicate that 7 *Hnf1b*<sup>Sp2/+</sup> mice died from P1 and P25. The causes of death were not defined due to cannibalism.

| Table S2: Primers used for Q- and semi-Q-RT-PCRs                      |                                                                            |                |                                                      |
|-----------------------------------------------------------------------|----------------------------------------------------------------------------|----------------|------------------------------------------------------|
| Gene symbol                                                           | Gene name                                                                  | RefSeq (NCBI)  | Primers (5'-3')                                      |
| <i>Aqp2</i>                                                           | aquaporin 2                                                                | NM_009699      | CCATTGGTTTCTCTGTTACCCTG<br>CGGTGAAATAGATCCCAAGGAG    |
| <i>Bicc1</i>                                                          | protein bicaudal C homolog 1 isoform 2                                     | NM_001347189   | TGAGGTCAGAACACCTACGA<br>AGTGCAGTGAAGACTGTCCA         |
| <i>Crb3</i>                                                           | crumbs family member 3                                                     | NM_001347408   | CCTGTCTTCAGGGGCTATTG<br>TCGCATGAGCAGAAACAGTC         |
| <i>Cyclo</i>                                                          | cyclophilin A                                                              | NM_120034.2    | CAGGTCCTGGCATCTTGTCC<br>TTGCTGGTCTTGCCATTCT          |
| <i>Cys1</i>                                                           | cystin 1                                                                   | NM_001004455   | AGAGGAGCTCATGGCGAGCATT<br>CTGTGGCACAGATGCCAAGAGG     |
| <i>Glis2</i>                                                          | GLIS family zinc finger 2                                                  | NM_031184      | GACGAGCCCCTCGACCTAA<br>AGCTCTCGATGCAAAGCATGA         |
| <i>Glis3</i>                                                          | GLIS family zinc finger 3                                                  | NM_001305671   | TGTGGCATGAATCTCCACCG<br>TGATGGGAGGGATATGTTGACC       |
| <i>Hnf1a</i>                                                          | hepatocyte nuclear factor 1 (HNF-1), alpha                                 | NM_009327.3    | GTGTAAGTGCACAGGAGGCAAA<br>TTCTCAGTGTCCCAAGACCTA      |
| <i>Hnf1b</i> : WT transcript in <i>Hnf1b</i> <sup>Sp2/+</sup> samples | hepatocyte nuclear factor 1 (HNF-1), beta                                  | NM_001291268.1 | CGAGGTGGACCGGATGCTCA<br>TCGGAGGATCTCCGGTTGCT         |
| <i>Hnf4a</i>                                                          | hepatocyte nuclear factor 4 (HNF-4), alpha                                 | NM_001312906.1 | CCATCATCTTCTTTGATCCAG<br>CTCACTTGCACCTGTGACC         |
| <i>Ihh</i>                                                            | Indian hedgehog                                                            | NM_001313683   | CCACGTGCATTGCTCTGTCA<br>CACGCTCCCCGTTCTCTAGG         |
| <i>Kcnj1</i>                                                          | potassium inwardly-rectifying channel, subfamily J, member 1               | NM_001168354   | TGTCTCCACGTTTACCCAGCA<br>CGTTGCCGAGAACGCCCAAATA      |
| <i>Kif12</i>                                                          | kinesin family member 12                                                   | NM_001317352   | GAGGCCAATAGCATCAACCG<br>GGAGATGCAGTGGCCCAAT          |
| <i>Lrp2</i>                                                           | low density lipoprotein receptor-related protein 2                         | NM_001081088   | AAAATGGAAACGGGGTGACTT<br>GGCTGCATACATTGGGTTTTCA      |
| <i>Nphp2</i>                                                          | inversin                                                                   | NM_010569      | ACTTGTACCCAGCATATGTGGTC<br>AGGAGAAAACATTTGAACCTTGCTT |
| <i>Nphp4</i>                                                          | nephronophthisis 4 (juvenile) homolog (human)                              | NM_153424      | TTGGCAATAAGCCAGAATCTCC<br>TGATACAGCCTCAACCGTTTGTC    |
| <i>Pkd1</i>                                                           | polycystic kidney disease 1 homolog                                        | NM_013630      | GCTGCATGCCAGTCTTTTTG<br>TTTTAAAGTGCAGAAAGCCCA        |
| <i>Pkd2</i>                                                           | polycystic kidney disease 2                                                | NM_008861      | CATGTCTCGATGTGCCAAAGA<br>ATGGAGAACATTATGGTGAAGCC     |
| <i>Pkhd1</i>                                                          | polycystic kidney and hepatic disease 1                                    | NM_153179      | ATGGAGAACATTATGGTGAAGCC<br>ATGTTTCTGGTCAACAGCCC      |
| <i>Tg737</i>                                                          | transgene insert site 737, insertional mutation, polycystic kidney disease | NM_009376      | GCAGGCTTCAACCTCATCCTTA<br>TTTCTCCCGATCTCCAATGG       |
| <i>Tmem27</i>                                                         | transmembrane protein 27                                                   | NM_001313719   | TCTATCTGGAATCCGGCAAC<br>CACTCCAGGTGGTCTTTTGT         |
| <i>Wnt9B</i>                                                          | wingless-type MMTV integration site family, member 9B                      | NM_011719      | GTGAGAAGGAAGATGGTGAGC<br>GCAGAATCTGGAGAAGTTGGC       |
| <i>Umod</i>                                                           | uromodulin                                                                 | NM_001278605.1 | CTGCACCGATCCTAGTTCCG<br>TCTACCCTGCATTCTTCGCAA        |

| Primers used for semiquantitative RT-PCR |                                           |                |                                           |
|------------------------------------------|-------------------------------------------|----------------|-------------------------------------------|
| Gene symbol                              | Gene name                                 | RefSeq (NCBI)  | Primers (5'-3')                           |
| <i>vATG</i>                              | hepatocyte nuclear factor 1 (HNF-1), beta | NM_001291268.1 | TGGTGTACAGCTCACGTC                        |
| <i>V695</i>                              | hepatocyte nuclear factor 1 (HNF-1), beta | NM_001291268.1 | GAGCAGGTGTCTCCGACTGC                      |
| <i>Gapdh</i>                             | glyceraldehyde-3-phosphate dehydrogenase  | NM_001289726.1 | TCCAGTATGACTCCACTCAC<br>ACCTTGCCACAGCCTTG |

**Table S3:** E14.5, E15.5, E17.5 and P1 transcriptomic profiles (Files 1-4). Shared differentially expressed genes between stages (File 5). Differentially expressed anchor early proximal tubules, proximal tubule, Loop of Henle/distal tubule at E17.5 and P1 (File 6). SLC-transmembrane transporters differentially expressed (File 7). Transcriptomic profile comparisons of *Hnf1b*<sup>Sp2/+</sup> at E17.5 and P1 and those reported for *Hnf4a* P1 mutant kidney (Marable et al., 2020) (File 8).

[Click here to download Table S3](#)

**Table S4: Gene ontology enrichment analysis of downregulated genes at E14.5, E15.5, E17.5 and P1. Selected Gene ontology (GO) terms of differentially expressed genes at different stages (File 5).**

GO term enrichment analysis using ToppGene informatics at different stages (Chen et al., 2009), showing the most important GO-terms at each stage.

[Click here to download Table S4](#)

**Table S5. Renal phenotypes, Kidney-to-body weight ratios and basal parameters of WT and *Hnf1b*<sup>Sp2/+</sup> adult mice****A. Percentages of renal phenotypes in adult *Hnf1b*<sup>Sp2/+</sup> mice**

|                                | <i>Hnf1b</i> <sup>Sp2/+</sup> | <i>Hnf1b</i> <sup>Sp2/+</sup> |
|--------------------------------|-------------------------------|-------------------------------|
| Age: 6-15 months               | Males*                        | Females                       |
| Number of mice                 | 48                            | 18                            |
| Unilateral hydronephrosis (%)  | 41                            | 33                            |
| Pelvic dilatations (%)         | 14                            | 27                            |
| Glomerular cysts (%)           | 80                            | 85                            |
| Microcysts (%)                 | 25                            | 15                            |
| Renal dysplasia/hypoplasia (%) | 2                             |                               |

\* Absence of apparent histological phenotype in 8% of males. WTs do not show renal phenotypes, excepted of pelvic dilatations in 3% of C57BL/6N adult mice (males/females).

**B. Kidney-to-body weight ratios of WT and *Hnf1b*<sup>Sp2/+</sup> males**

| Age                       | 1 month            |                               | 5 months    |                               | 10 months   |                               | 12 months   |                               | 16-20 months |                               |
|---------------------------|--------------------|-------------------------------|-------------|-------------------------------|-------------|-------------------------------|-------------|-------------------------------|--------------|-------------------------------|
|                           | WT                 | <i>Hnf1b</i> <sup>Sp2/+</sup> | WT          | <i>Hnf1b</i> <sup>Sp2/+</sup> | WT          | <i>Hnf1b</i> <sup>Sp2/+</sup> | WT          | <i>Hnf1b</i> <sup>Sp2/+</sup> | WT           | <i>Hnf1b</i> <sup>Sp2/+</sup> |
| Body Weight (BW) (g)      | 20,2 ± 2,6         | 18,28 ± 0,83                  | 35,1 ± 1,52 | 29,3 ± 6,46                   | 31,2 ± 2,7  | 30,1 ± 1,5                    | 37,7 ± 4,38 | 29,2 ± 1,77                   | 33,1 ± 5,5   | 30,6 ± 6,2                    |
| Left Kidney Weight (KW)   | <u>0,14 ± 0,01</u> | <u>0,11 ± 0,02*</u>           | 0,2 ± 0,02  | 0,19 ± 0,03                   | 0,22 ± 0,04 | 0,22 ± 0,04                   | 0,29 ± 0,05 | 0,17 ± 0,09                   | 0,25 ± 0,06  | 0,22 ± 0,07                   |
| Right Kidney Weight (KW)  | <u>0,14 ± 0,01</u> | <u>0,11 ± 0,02*</u>           | 0,22 ± 0,01 | 0,23 ± 0,04                   | 0,24 ± 0,04 | 0,21 ± 0,04                   | 0,26 ± 0,02 | 0,19 ± 0,001                  | 0,27 ± 0,08  | 0,22 ± 0,06                   |
| KW (left) /BW             | <u>0,71 ± 0,05</u> | <u>0,58 ± 0,07*</u>           | 0,6 ± 0,09  | 0,66 ± 0,24                   | 0,72 ± 0,07 | 0,74 ± 0,15                   | 0,77 ± 0,08 | 0,59 ± 0,13                   | 0,75 ± 0,07  | 0,72 ± 0,19                   |
| KW (right) /BW            | <u>0,69 ± 0,05</u> | <u>0,59 ± 0,05*</u>           | 0,65 ± 0,07 | 0,79 ± 0,03                   | 0,78 ± 0,11 | 0,70 ± 0,15                   | 0,72 ± 0,08 | 0,66 ± 0,05                   | 0,82 ± 0,15  | 0,72 ± 0,13                   |
| Ratio KW (left+right) /BW | <u>1,40 ± 0,1</u>  | <u>1,16 ± 0,11*</u>           | 1,24 ± 0,17 | 1,45 ± 0,27                   | 1,50 ± 0,15 | 1,44 ± 0,27                   | 1,49 ± 0,14 | 1,15 ± 0,18                   | 1,58 ± 0,19  | 1,44 ± 0,23                   |
|                           | n=3                | n=5                           | n=2         | n=2                           | n=6         | n=5                           | n=3         | n=2                           | n=5          | n=11                          |

Values represent the mean ± SEM of the indicated numbers (n) of male mice. Animals with the 2 kidneys to total body weight ratio lower than 1.4 are considered as low. *Hnf1b*<sup>Sp2/+</sup> kidneys of one-month mice exhibit a moderate hypoplasia manifested by the low kidney-to-body ratio. Note also that there is a bias in these ratios in cases of pelvic dilations of *Hnf1b*<sup>Sp2/+</sup>. Unpaired 2-tailed *t*-test (\*) P < 0,05

**C. Basal parameters of WT and *Hnf1b*<sup>Sp2/+</sup> males**

| AGE                                                 | 5-6 months                         |                                      | 12 months                          |                                      |
|-----------------------------------------------------|------------------------------------|--------------------------------------|------------------------------------|--------------------------------------|
|                                                     | WT (n=11)                          | <i>Hnf1b</i> <sup>Sp2/+</sup> (n=13) | WT (n=11)                          | <i>Hnf1b</i> <sup>Sp2/+</sup> (n=14) |
| Basal parameters                                    |                                    |                                      |                                    |                                      |
| Body weight (BW, g)                                 | 31,137 ± 5,622                     | 29,683 ± 3,5                         | 36,5 ± 5,39                        | 35,87 ± 4,9                          |
| Water intake (ml/day)                               | <u>3,909 ± 1,43</u>                | <u>5,361 ± 1,81*</u>                 | 2,703 ± 1,196                      | 3,409 ± 0,64                         |
| Water intake (20g BW)                               | <u>2,51 ± 0,91</u>                 | <u>3,61 ± 1,2*</u>                   | 1,47 ± 0,65                        | 1,9 ± 0,35                           |
| Urine volume (ml/day)                               | <u>0,79 ± 1,43</u>                 | <u>1,615 ± 1,187*</u>                | 0,79 ± 1,43                        | 0,79 ± 1,43                          |
| Urine volume day (20g BW)                           | <u>0,507 ± 0,9</u>                 | <u>1,088 ± 0,79*</u>                 | 9 ± 1,43                           | 1 ± 1,43                             |
| Aliments (g/day)                                    | 3,91 ± 1,46                        | 3,39 ± 0,58                          | 1,15 ± 0,7                         | 1,58 ± 0,9                           |
| <b>RATIO</b>                                        | <i>Hnf1b</i> <sup>Sp2/+</sup> / WT |                                      | <i>Hnf1b</i> <sup>Sp2/+</sup> / WT |                                      |
| <i>Hnf1b</i> <sup>Sp2/+</sup> / WT Urine vol 20g BW | <b>2,14*</b>                       |                                      | <b>1,354</b>                       |                                      |
| <i>Hnf1b</i> <sup>Sp2/+</sup> / WT Water vol 20g BW | <b>1,43*</b>                       |                                      | <b>1,45</b>                        |                                      |

Values are the mean ± SEM and are the average of measurements from 2 days of urine sample collection under basal conditions at the indicated ages. Urine samples were from 3 different groups of mice at 5-6 & 12 months. Unpaired 2-tailed *t*-test (\*) P < 0,05.

**D. Water deprivation for 22h in 5-6 month WT and *Hnf1b*<sup>Sp2/+</sup> males**

| 5-6 month                      | WT (n=3)     | <i>Hnf1b</i> <sup>Sp2/+</sup> (n=4) |
|--------------------------------|--------------|-------------------------------------|
| Urine volume (mL)              |              |                                     |
| Baseline                       | 0,99 ± 0,34  | 0,81 ± 0,38                         |
| Water deprivation              | 0,28 ± 0,12  | 0,51 ± 0,33                         |
| Urine osmolality (mOsm/kg H2O) |              |                                     |
| Baseline                       | 1713 ± 358   | 2060 ± 793                          |
| Water deprivation              | 3794 ± 508** | 2837 ± 468*                         |

Values are the mean ± SEM after 22h of water deprivation. Upon water deprivation *Hnf1b*<sup>Sp2/+</sup> mice are less efficient than WT in decreasing urine volume excretion and increasing urine osmolality. n = number of mice.



**TABLE S6 : Differentially excreted urinary peptides between *Hnf1b*<sup>Sp2/+</sup> and WT mice.**

| Sequence                          | Protein name                                     | Accession number | Start (aa position) | Stop | Adjusted p-value | Fold Change |
|-----------------------------------|--------------------------------------------------|------------------|---------------------|------|------------------|-------------|
| <b>DOWN-REGULATED</b>             |                                                  |                  |                     |      |                  |             |
| WTDVGMSPRIESASLQGS DRV L          | Pro-epidermal growth factor                      | P01132           | 620                 | 641  | 0.0385           | -6,27       |
| GRMAHASmGNRPYGP NMANMPPQV GS      | AT-rich interactive domain-containing protein 1A | A2BH40           | 857                 | 882  | 0.0009           | -5,02       |
| PAAPGPAGSPANDNGNGNGNGNG NGGK GKPA | Striatin-interacting proteins 2                  | Q8C9H6           | 4                   | 36   | 0.002            | -4,95       |
| LSSLKHPSNIAVDPIERL                | Pro-epidermal growth factor                      | P01132           | 161                 | 178  | 0.0028           | -4,54       |
| SSLKHPSNIAVDPIERLM                | Pro-epidermal growth factor                      | P01132           | 162                 | 179  | 0.0063           | -3,7        |
| ALDYDPVESKIYFAQTA                 | Pro-epidermal growth factor                      | P01132           | 522                 | 538  | 0.0005           | -3,7        |
| SGNFIDQTRVLNLGPITR                | Uromodulin                                       | Q91X17           | 590                 | 607  | 0.0385           | -2,81       |
| SSLKHPSNIAVDPIERL                 | Pro-epidermal growth factor                      | P01132           | 162                 | 178  | 0.0114           | -2,78       |
| GAGLEQEEAAG                       | Heterogeneous nuclear ribonucleoprotein U        | Q8VEK3           | 70                  | 80   | 0.0494           | -2,76       |
| SINKELQNSIIDL                     | Kidney androgen-regulated prot.                  | P61110           | 26                  | 38   | 0.0385           | -2,36       |
| SPRIESASLQGS DRV L                | Pro-epidermal growth factor                      | P01132           | 626                 | 641  | 0.0304           | -2,18       |
| LVSINKELQNSIIDLLNS                | Kidney androgen-regulated prot.                  | P61110           | 24                  | 41   | 0.0448           | -2,16       |
| PGApGAPGHPPGPV                    | Collagen alpha-1(III) chain                      | P08121           | 1039                | 1054 | 0.002            | -1,9        |
| GPpGPpGPpGPpG                     | Collagen alpha-1(XV) chain                       | O35206           | 704                 | 716  | 0.0436           | -1,71       |
| SINKELQNSIID                      | Kidney androgen-regulated prot                   | P61110           | 26                  | 37   | 0.0132           | -1,58       |
| DGQPGAKGEpGDTGVKGD                | Collagen alpha-1(I) chain                        | P11087           | 809                 | 826  | 0.0193           | -1,54       |
| SpGPDGKTGPpGP                     | Collagen alpha-1(I) chain                        | P11087           | 535                 | 547  | 0.0117           | -1,18       |
| <b>UP-REGULATED</b>               |                                                  |                  |                     |      |                  |             |
| PGAKGEpGDTGVKGD                   | Collagen alpha-1(I) chain                        | P11087           | 812                 | 826  | 0.0311           | 1,29        |
| pGpPGpRGpQGPNGADGPQGP             | Collagen alpha-1(XI) chain                       | Q61245           | 1219                | 1239 | 0.0145           | 1,38        |
| KpGERGLpGEF                       | Collagen alpha-2(I) chain                        | Q01149           | 575                 | 585  | 0.0466           | 1,43        |
| GpGERGEHGpGP                      | Collagen alpha-1(III) chain                      | P08121           | 795                 | 807  | 0.0212           | 1,53        |
| GlpGTGGpPGENGKpGEpGP              | Collagen alpha-1(III) chain                      | P08121           | 641                 | 660  | 0.0032           | 1,62        |
| NIGFpGPKGSPSGDpGKpGERGHpG         | Collagen alpha-2(I) chain                        | Q01149           | 497                 | 520  | 0.0311           | 1,68        |
| GPpGPTGPAGDKGD                    | Collagen alpha-1(III) chain                      | P08121           | 617                 | 630  | 0.0348           | 1,69        |
| GLPpGAPpGEAGKpGEQ                 | Collagen alpha-1(I) chain                        | P11087           | 633                 | 650  | 0.0009           | 1,69        |
| GQPpGAKGEpGDTGVKGDAGpGP           | Collagen alpha-1(I) chain                        | P11087           | 810                 | 832  | 0.0348           | 1,74        |
| DGTpGGpGIRGmpG                    | Collagen alpha-1(III) chain                      | P08121           | 526                 | 539  | 0.0464           | 1,8         |
| TGPIpPGPAGApGDkGEA                | Collagen alpha-1(I) chain                        | P11087           | 755                 | 773  | 0.0287           | 1,87        |
| GPpGEAGKpGEQ                      | Collagen alpha-1(I) chain                        | P11087           | 639                 | 650  | 0.0375           | 1,94        |
| GPIGPpGPAGQpGDKGEGSpGLpG          | Collagen alpha-1(III) chain                      | P08121           | 764                 | 788  | 0.0132           | 2           |
| EAGKpGEQVpGDLGApGP                | Collagen alpha-1(I) chain                        | P11087           | 643                 | 661  | 0.0348           | 2,04        |
| GQpGAKGEpGDTGVKGDAGppGP           | Collagen alpha-1(I) chain                        | P11087           | 810                 | 832  | 0.0348           | 2,16        |
| RDGApGAKGDRGETGP                  | Collagen alpha-1(I) chain                        | P11087           | 1015                | 1030 | 0.0032           | 2,26        |
| GLpGPAGPpGEAGKpGEQGVpG            | Collagen alpha-1(I) chain                        | P11087           | 633                 | 654  | 0.0231           | 2,31        |
| TTGEVgKpGERGLpGEF                 | Collagen alpha-2(I) chain                        | Q01149           | 569                 | 585  | 0.0375           | 2,48        |
| GEpGAKGERGApGEKGE                 | Collagen alpha-1(III) chain                      | P08121           | 818                 | 835  | 0.002            | 2,72        |
| AGQpGEKGPpGAQGPpGSpGPLG           | Collagen alpha-1(III) chain                      | P08121           | 925                 | 947  | 0.0054           | 3,06        |
| EVGKpGERGLpGEF                    | Collagen alpha-2(I) chain                        | Q01149           | 572                 | 585  | 0.002            | 3,13        |
| pGPAGpPGEAGKpGEQGVpGDLG           | Collagen alpha-1(I) chain                        | P11087           | 635                 | 657  | 0.0005           | 6,9         |
| GpPGEAGKpGEQGVpGDLGApGP           | Collagen alpha-1(I) chain                        | P11087           | 639                 | 661  | 0.0008           | 7,07        |

Data were obtained from 17 *Hnf1b*<sup>Sp2/+</sup> and 18 WT mice from 3 to 15 months. 40 peptides with different abundance in urine between the two groups were selected after multiple testing (**Material and Methods**). No differences were observed among different ages. *P* values were defined using Wilcoxon rank-sum test followed by adjustment for multiple testing. Peptides are separated according to *Hnf1b*<sup>Sp2/+</sup> mice urinary results (up- and down-excreted).

**Table S7: List of antibodies**

| Primary Antibodies            | Species             | Source                                              | Dilution |
|-------------------------------|---------------------|-----------------------------------------------------|----------|
| HNF1A                         | rabbit              | M. DeVas and J. Ferrer<br>(Imperial College London) | 1/100    |
| HNF1B                         | rabbit              | Santa Cruz Biotechnology (H-85 sc22840)             | 1/100    |
| HNF1B                         | rabbit              | homemade (westerns)                                 | 1/500    |
| HNF1B                         | rabbit              | Sigma-Aldrich (HPA002083)                           | 1/500    |
| HNF4a                         | rabbit              | Abcam (ab181604)                                    | 1/50     |
| PAX2                          | rabbit              | Covance (PRB-276P)                                  | 1/300    |
| AQP1                          | rabbit              | Alpha Diagnostic int. (AQP1 1-A)                    | 1/300    |
| AQP2                          | rabbit              | M. Knepper NIH Bethesda                             | 1/300    |
| NKCC2                         | rabbit              | M. Knepper NIH Bethesda                             | 1/100    |
| Uromuroid (Umod)              | goat                | MP Biomedicals, Illkrich, France (54140)            | 1/300    |
| Collectrin                    | sheep               | RD Systems (Ref AF4965)                             | 1/250    |
| LTA-biotin and FITC           |                     | Vector lab (FL-1321)                                | 1/200    |
| DBA Biotin and FITC           |                     | Vector lab (B-1035)                                 | 1/100    |
| WT1                           | rabbit              | Santa Cruz Biotechnology (C19-SC192)                | 1/200    |
| Laminin                       | rabbit              | Sigma-Aldrich; St. Louis, MO (L9393)                | 1/100    |
| Calbindin D-28K               | rabbit              | Chemicon International (AB1778)                     | 1/100    |
| Pan cytokeratin               | mouse               | Sigma-Aldrich; St. Louis, MO (P2871)                | 1/50     |
| E-cadherin                    | mouse               | Sigma-Aldrich; St. Louis, MO (610182)               | 1/200    |
| MUC1                          | armenian<br>hamster | Neomarkers; Fremont, CA (Muc1 Ab-5)                 | 1/100    |
| Acetylated Alpha -<br>Tubulin | mouse               | Sigma-Aldrich; St. Louis, MO (T6793)                | 1/100    |
| ZO-1                          | rabbit              | Zymed laboratories (40-2300)                        | 1/100    |
| Vil1                          | rabbit              | Sylvie Robine, Institut Curie, France               | 1/200    |
| CUBN                          | rabbit              | Renata Kozyraki (Cordeliers Research Center)        | 1/1000   |
| LRP2                          | sheep               | Renata Kozyraki (Cordeliers Research Center)        | 1/1000   |
| Phospho Histone H3            | mouse               | Cell Signaling (6G3)                                | 1/200    |
| Alpha-Tubulin                 | monoclonal          | Sigma-Aldrich; St. Louis, MO (T9026)                | 1/10.000 |
| Secondary Antibodies          | species             | Source                                              | Dilution |
| Alexa Fluor 488               | rabbit              | Invitrogen                                          | 1/500    |
| Alexa Fluor 488               | mouse               | Invitrogen                                          | 1/500    |
| FITC Armenian hamster         | Armenian<br>hamster | Jackson (127-095-160)                               | 1/500    |
| Biotin rabbit                 |                     | Vector                                              | 1/1000   |
| Biotin mouse                  |                     | Vector                                              | 1/1000   |
| Biotin Goat                   |                     | Vector                                              | 1/1000   |
| Streptavidin-Alexa 594        |                     | Jackson ImmunoResearch                              | 1/500    |
| Streptavidin-Alexa 488        |                     | Jackson ImmunoResearch                              | 1/500    |
| Peroxidase (westerns)         | Rabbit              | Jackson ImmunoResearch                              | 1/10.000 |
| Peroxidase (westerns)         | Mouse               | Jackson ImmunoResearch                              | 1/10.000 |

**Table S8: Summary of RNA samples from embryonic kidneys at the indicated stages employed in RNA-seq analysis**

| Stage          | WT             | WT           | <i>Hnf1b</i> <sup>Sp2/+</sup> | <i>Hnf1b</i> <sup>Sp2/+</sup> |
|----------------|----------------|--------------|-------------------------------|-------------------------------|
| <b>E14.5</b>   | SCR10-E145-4wt | SCR13-E144wt | SCR12-E145 HET                | SCR15-E145-HET                |
| <b>E15.5</b>   | WT (Pool n=3)  |              | TR (Pool n=3)                 |                               |
| <b>E17.5</b> * | GZS 17         | GZS 35 (n=3) | GSZ 34 (n=3)                  | GSZ 36 (n=3)                  |
| <b>P1</b>      | SCR20_P1_      | SCR21_P1_    | SCR22 P1                      | SCR23_P1                      |

*RNA was prepared from the 2 kidneys of each embryo, except when the n is indicated (i.e. E15.5 and E17.5) \* RNA from 2 litters born the same day in the same cage (Pool n=3, 6 kidneys)*
